# Supplementary material for: Biodegradable polyester copolymers: synthesis based on the Biginelli reaction, characterization, and evaluation of their application properties
Source: Royal Society of Chemistry journal article supplement (doi:10.1039/d4ra02002b), 2024-01-01
Supplement: d4ra02002b1.pdf [file d4ra02002b1.pdf]

## Supporting Information

### **Synthesis of biodegradable polyester composites based on the Biginelli reaction and their properties**

Kai Lu,<sup>a</sup> Xinyi Shen,<sup>a</sup> Yunhai Shi,<sup>a</sup> Zejian He,<sup>\*b,c</sup> Dahong Zhang<sup>\*d</sup> and Mi Zhou<sup>\*a</sup>

\* Corresponding author

E-mail address: [hezejian@zju.edu.cn](mailto:hezejian@zju.edu.cn) (Z. He), [zhangdahong88@126.com](mailto:zhangdahong88@126.com) (D. Zhang),

[zhoumi@zjut.edu.cn](mailto:zhoumi@zjut.edu.cn) (M. Zhou).

### Synthesis of PEG-AA.

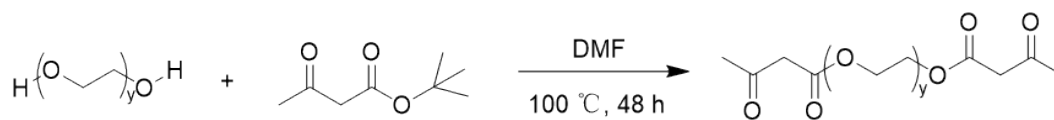

**Scheme S1.** synthesis process of PEG-AA.

### Synthesis of functionalized segments.

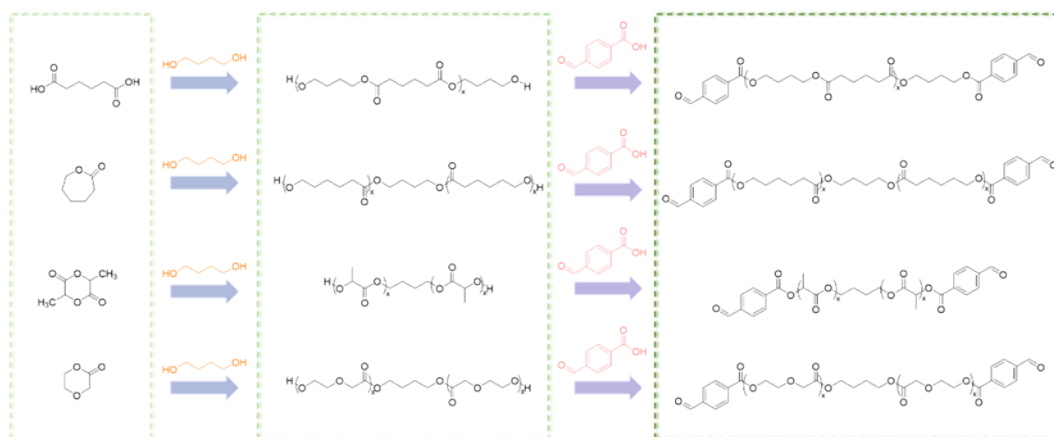

**Scheme S2.** synthesis process of PBA-Bz, PCL-Bz, PLA-Bz, and PPDO-Bz.

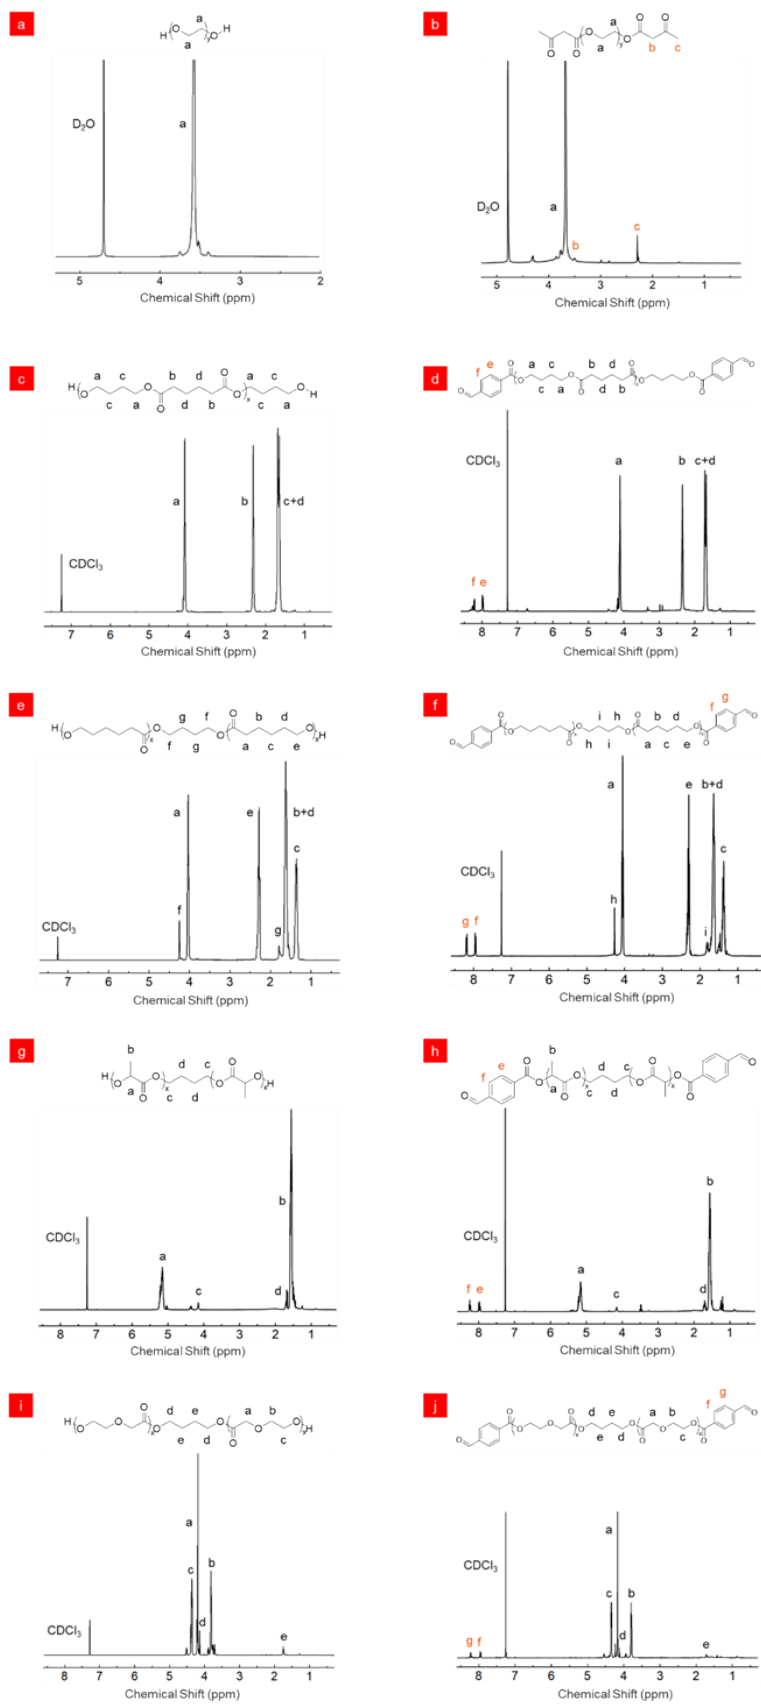

**Figure S1.**  $^1\text{H}$  NMR of PEG (a), PEG-AA (b), PBA (c), PBA-Bz (d), PCL (e), PCL-Bz (f), PLA (g), PLA-Bz (h),

PPDO (i), and PPDO-Bz (j).

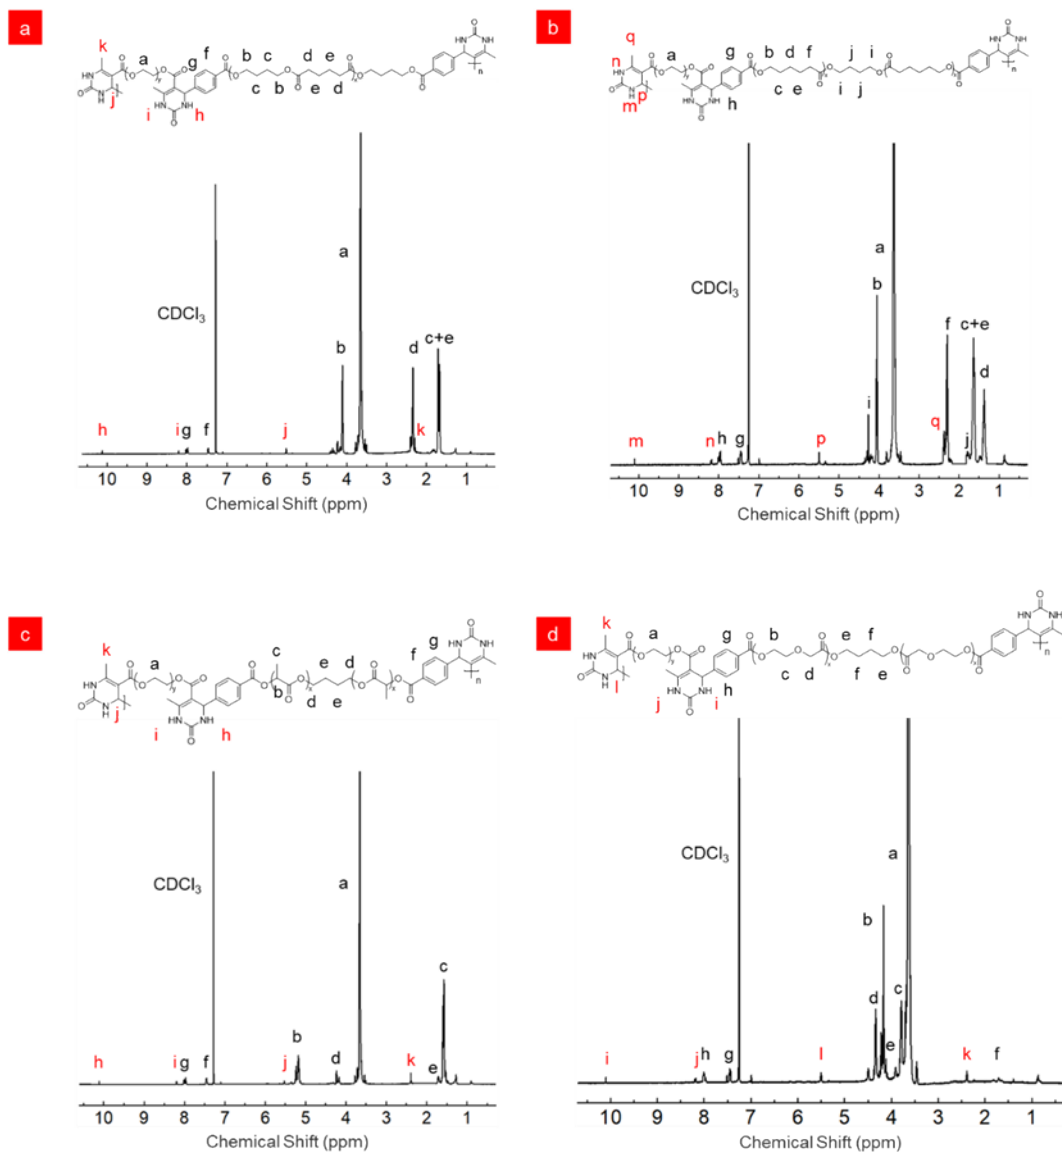

**Figure S2.**  $^1\text{H}$  NMR of DHPM-PBA (a), DHPM-PCL (b), DHPM-PLA (c), and DHPM-PPDO (d).

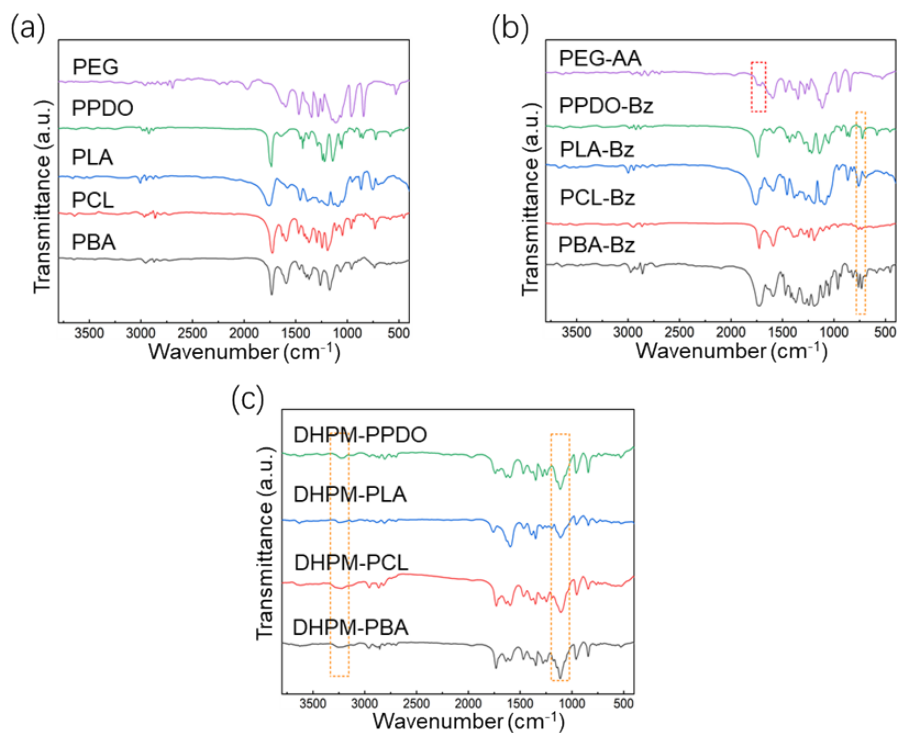

**Figure S3.** FT-IR spectra of PEG, PBA, PCL, PLA, and PPDO (a); PEG-AA, PBA-Bz, PCL-Bz, PLA-Bz, and PPDO-Bz (b); and DHPM-PBA, DHPM-PCL, DHPM-PLA, and DHPM-PPDO (c).

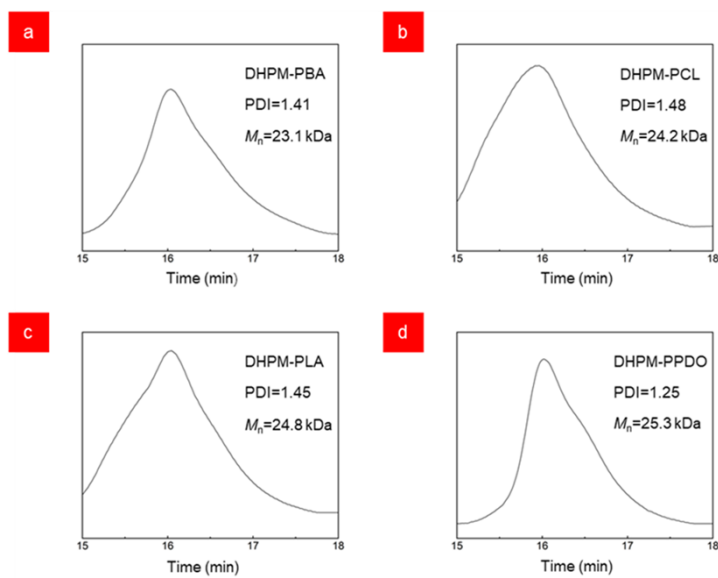

**Figure S4.** GPC trace of DHPM-PBA (a), DHPM-PCL (b), DHPM-PLA (c), and DHPM-PPDO (d).

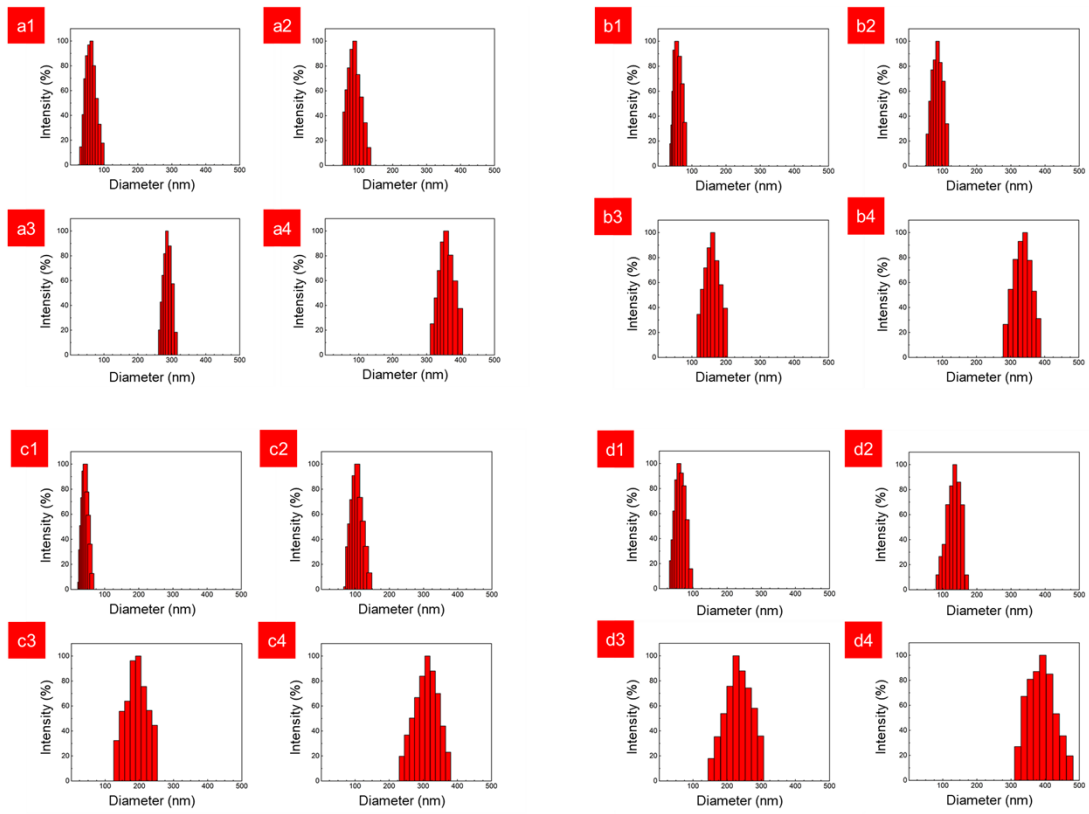

**Figure S5.** Size regulation of micelles. (a) DHPM-PBA (b) DHPM-PCL (c) DHPM-PLA (d) DHPM-PPDO.

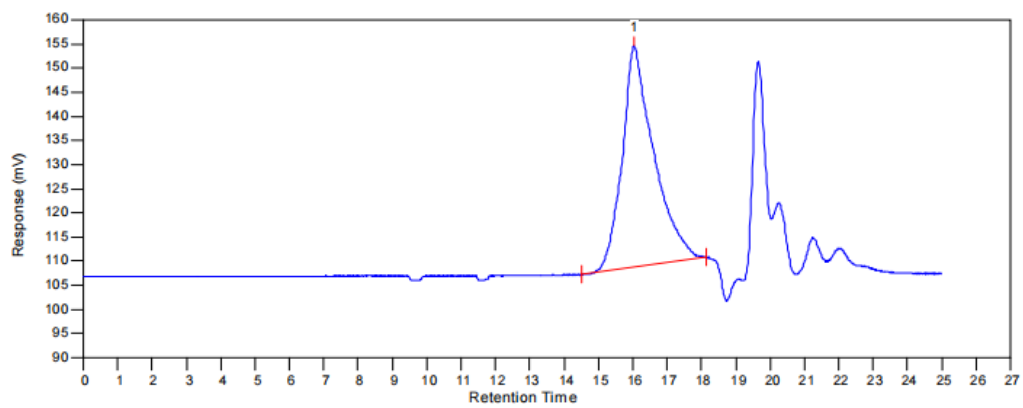

**Figure S6.** GPC trace of DHPM-PBA.

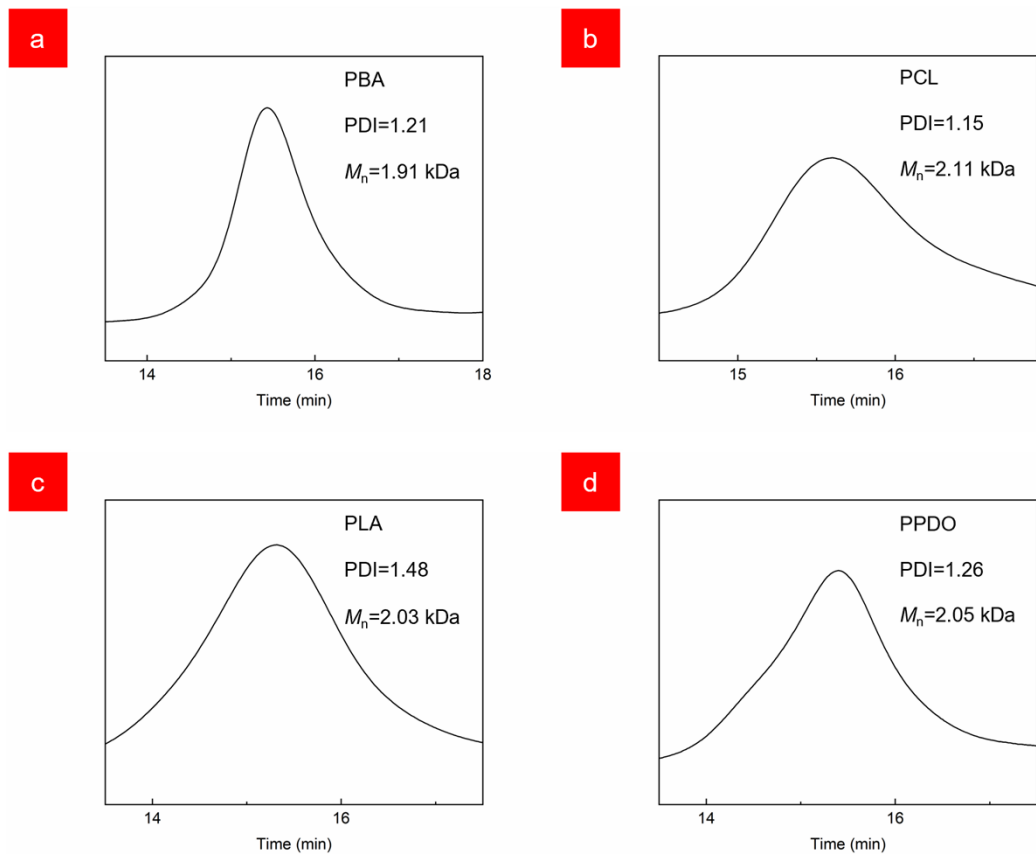

**Figure S7.** GPC trace of PBA (a), PCL (b), PLA (c), and PPDO (d). The data was from a different Agilent PL-GPC220 gel chromatograph than that of Figure S4, and other conditions were the same.

**Table S1.** Elemental analysis of DHPM-PBA, DHPM-PCL, DHPM-PLA, and DHPM-PPDO

| Sample    | C (%) | H (%) | O (%)  | N (%) |
|-----------|-------|-------|--------|-------|
| DHPM-PBA  | 55.13 | 8.468 | 36.002 | 0.40  |
| DHPM -PCL | 55.35 | 8.426 | 35.644 | 0.58  |
| DHPM -PLA | 52.39 | 7.916 | 39.184 | 0.51  |
| DHPM-PPDO | 52.82 | 8.530 | 38.130 | 0.52  |

**Table S2.** Non-isothermal crystallization parameters of PEG, PBA, PCL, PLA, PPDO, DHPM-PBA, DHPM-PCL, DHPM-PLA, and DHPM-PPDO.

| Sample    | Cooling curves |                       | Heating curves |                    |           |
|-----------|----------------|-----------------------|----------------|--------------------|-----------|
|           | $T_c$ (°C)     | $\Delta H_{mc}$ (J/g) | $T_m$ (°C)     | $\Delta H_m$ (J/g) | $X_c$ (%) |
| PEG       | 30.94          | -167.63               | 56.15          | 174.03             | 84.77     |
| PPDO      | 23.93          | -56.97                | 85.88          | 134.97             | 65.95     |
| PLA       | -              | -                     | -              | -                  | -         |
| PCL       | 13.59          | -88.39                | 39.68          | 93.54              | 63.56     |
| PBA       | 28.03          | -65.21                | 49.84          | 68.99              | 48.29     |
| DHPM-PPDO | 19.45          | -139.08               | 51.40          | 138.34             | 61.79     |
| DHPM-PLA  | -2.75          | -44.94                | 49.33          | 108.44             | 26.75     |
| DHPM-PCL  | 0.73           | -95.18                | 44.24          | 98.409             | 52.48     |
| DHPM-PBA  | 14.60          | -110.83               | 48.11          | 125.18             | 71.45     |



---

**Table S3.** Thermal propertial data of PEG, PBA, PCL, PLA, PPDO, DHPM-PBA, DHPM-PCL, DHPM-PLA, and DHPM-PPDO.

| Sample    | $T_{d5\%}$ (°C) | $T_{dmax}$ (°C) | $T_{d95\%}$ (°C) |
|-----------|-----------------|-----------------|------------------|
| PEG       | 360.7           | 419.7           | 436.7            |
| PBA       | 225.7           | 427.7           | 451.7            |
| PCL       | 381.0           | 426.0           | 454.0            |
| PLA       | 208.7           | 355.7           | 394.7            |
| PPDO      | 201.7           | 276.7           | 302.7            |
| DHPM-PBA  | 366.7           | 423.7           | 444.7            |
| DHPM-PCL  | 371.7           | 424.7           | 453.7            |
| DHPM-PLA  | 337.7           | 419.6           | 445.6            |
| DHPM-PPDO | 322.7           | 416.7           | 439.7            |
